# Supplementary material
Source: publisher figshare collection journal article supplement (https://gsajournals.figshare.com/articles/dataset/_/13356137)
Supplement: Supplementary file 2 [file 1]

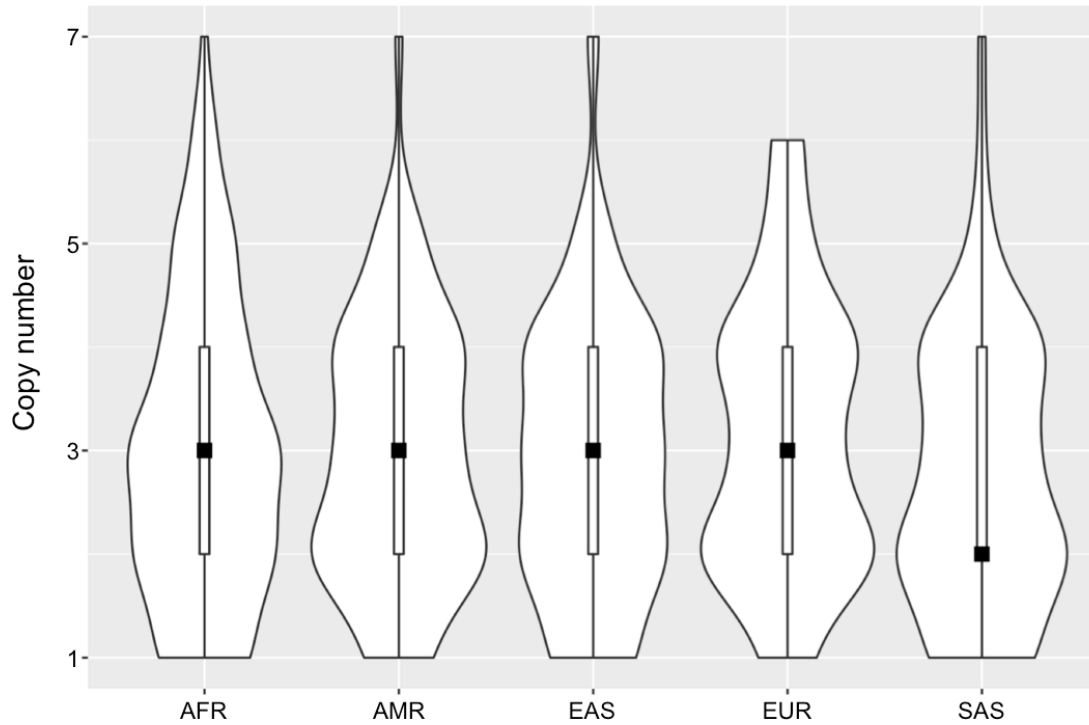

**Figure S3.** Population distribution of full copy numbers at the 7q11.23 A-CNV. Violin plot shows the density of the copy number distribution for each population, with internal box plots showing the median in black and the 25<sup>th</sup> and 75<sup>th</sup> percentiles as the two ends of the box.
