# Supplementary material
Source: publisher figshare collection journal article supplement (https://gsajournals.figshare.com/articles/dataset/_/13356137)
Supplement: Supplementary file 4 [file 1]

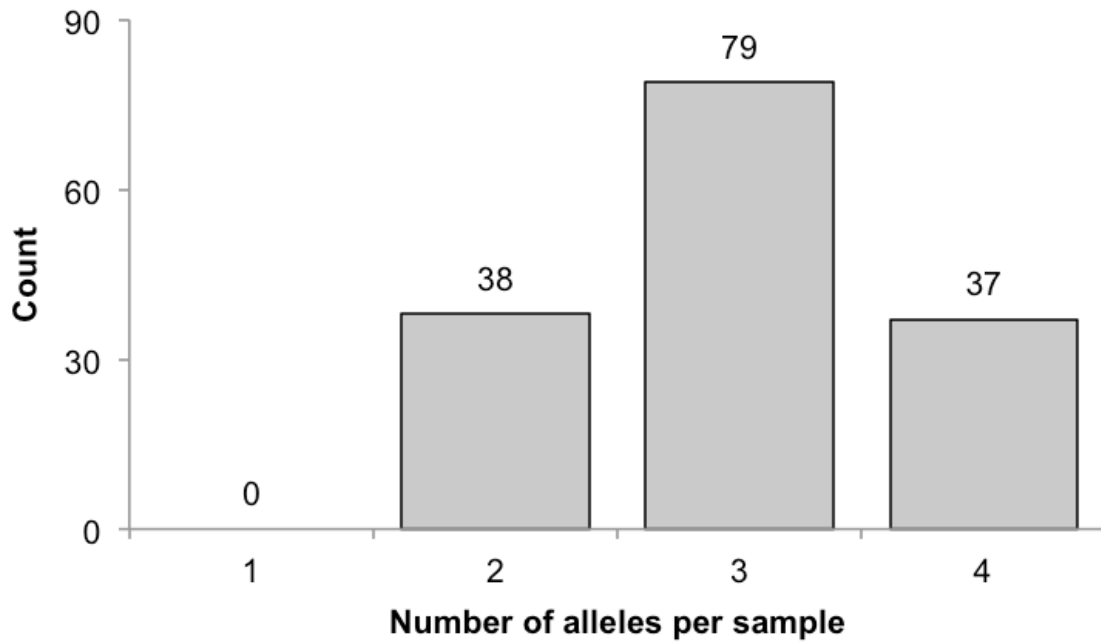

**Figure S2.** Number of distinct alleles per sample for the 7q11.23 A-CNV. Allele counts include full and partial copy number variants as well as non-standard alleles, as shown in Figure S4.
